# Supplementary material for: Ciliary parathyroid hormone signaling activates transforming growth factor-β to maintain intervertebral disc homeostasis during aging
Source: PubMed Central journal article supplement (PMC6050246; doi:10.1038/s41413-018-0022-y), 2018-07-18
Supplement: 41413_2018_22_MOESM1_ESM.pdf [file 41413_2018_22_MOESM1_ESM.pdf]

## Supplementary information

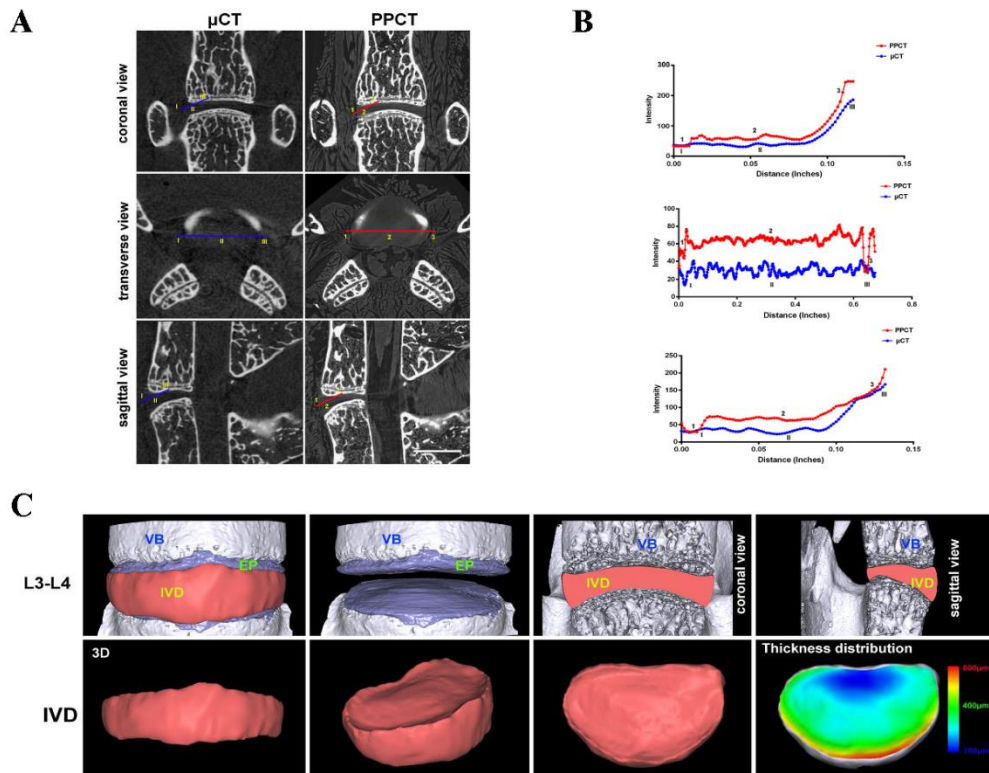

**Supplementary Figure 1 3D visualization of IVDs by propagation phase contrast microtomography (PPCT) based on the Synchrotron radiation.** (A) Coronal, transverse and sagittal views of the intervertebral disc were detected by PPCT; these views of the disc are difficult to delineate with conventional  $\mu$ CT. (B) The intensity distribution of the correspondence lines marked in (A). The blue line (I, II and III) refer to  $\mu$ CT, whereas the red line (1, 2 and 3) refer to PPCT. (C) Intact 3D images of the L3-4 segment. The vertebra (VB), endplate (EP) and IVD could be visualized separately and from multiple perspectives. The 3D thickness distribution could be defined using different color coding. Scale bar, 500  $\mu$ m.

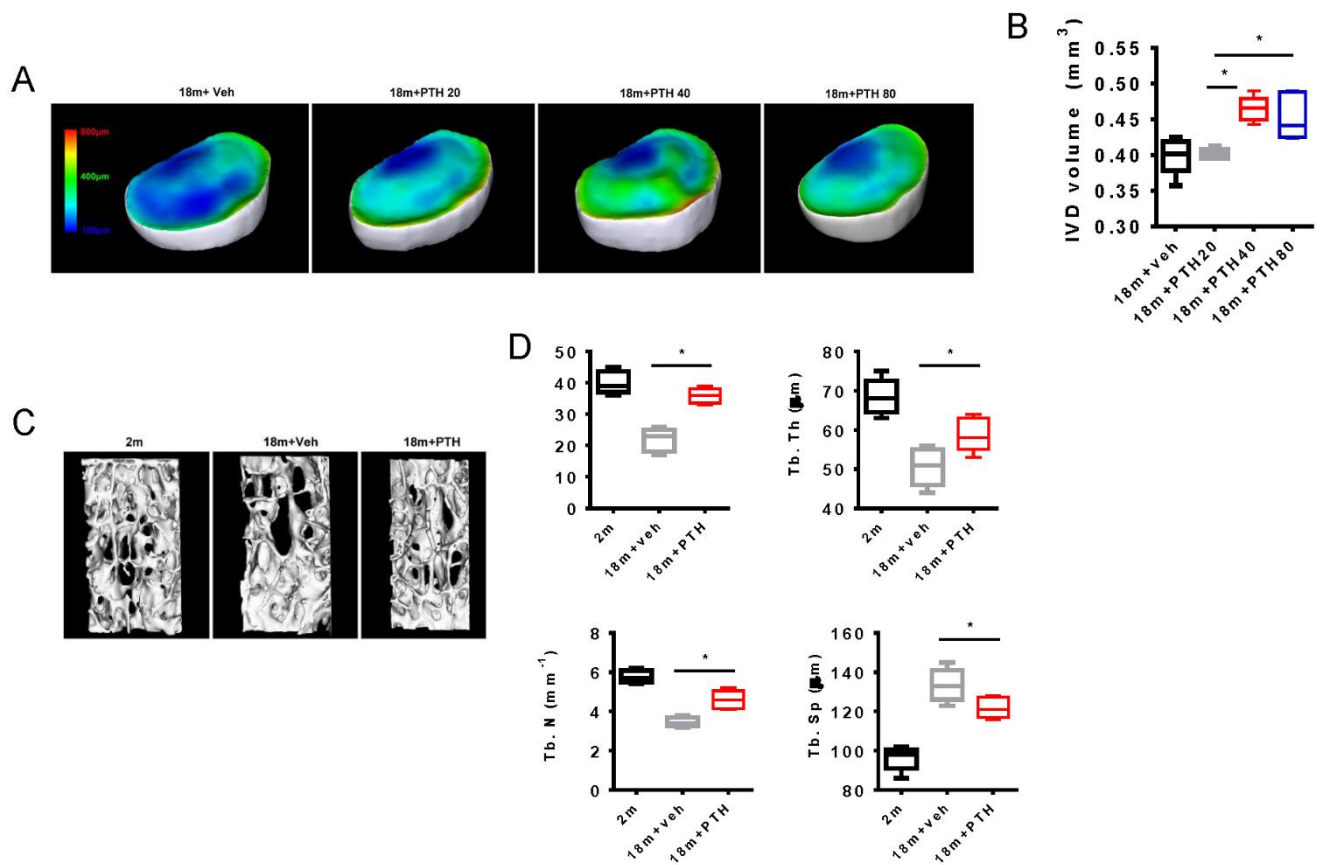

**Supplementary Figure 2 The dose screen of intermittent PTH effect on IVD volume.** (A) The 3D thickness distribution of IVD with iPTH injection of PTH (1-34) 20 µg/kg/d, 40 µg/kg/d and 80 µg/kg/d, daily for 8 weeks. (B) Quantitative analysis of IVD volume of (A). (C) 3D image of L4 vertebra microarchitecture from 2-month old mice and 18-month old mice with or without iPTH. (D) Quantitative analysis of trabecular bone volume fraction (BV/TV), trabecular thickness (Tb. Th), trabecular number (Tb. N) and trabecular separation (Tb. Sp) with iPTH injection. \* $P < 0.05$ , \*\* $P < 0.01$ . Statistical significance was determined by one-way ANOVA and student  $t$ -test. All data are reported as the mean  $\pm$  s.d.

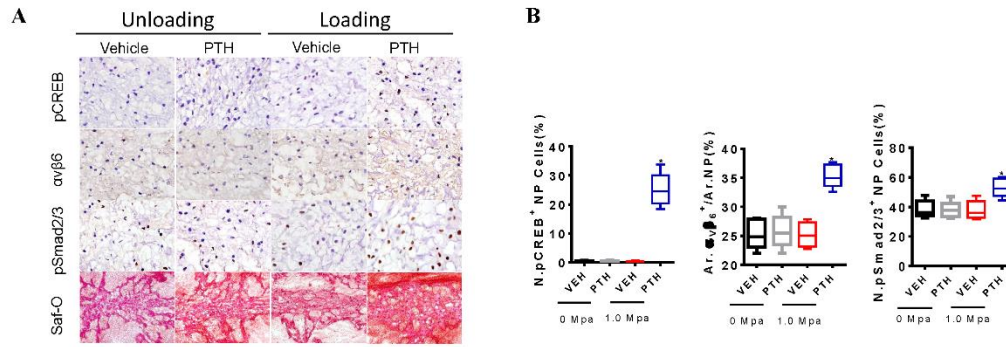

**Supplementary Figure 3 The effect of PTH treatment in an IVD ex vivo compression model of 3-month-old rat.** (A) pCREB, Integrin  $\alpha_v\beta_6$ , pSmad2/3 or Safranin-O staining of IVD sections from an IVD ex vivo compression model of 3-month-old rat with treatment of either vehicle or PTH (PTH1-34, 100nM). (B) Quantitative analysis of the percentage of pCREB, pSmad2/3 positive cells and the Integrin  $\alpha_v\beta_6$  positive areas as a percentage of total IVD area (Ar) of (t). All data are reported as the mean  $\pm$  s.d. \*P < 0.05, \*\*P < 0.01. n=8 per group. Statistical significance was determined by one-way ANOVA and student t-test.

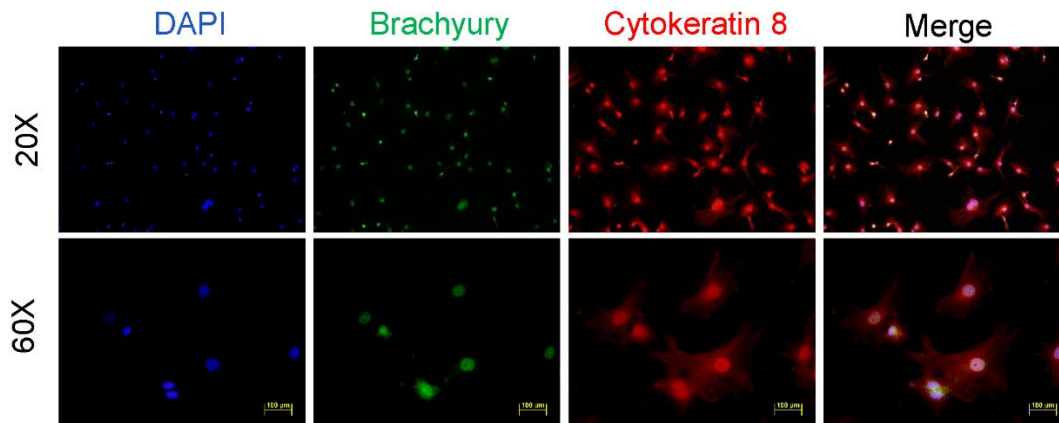

**Supplementary Figure 4 Identification of NP Cells from human lumbar disc specimens.** Immunostaining for DAPI (blue) and two markers of NP cell (Brachyury (green), Cytokeratin 8 (red)). Scale bar, 100µm.

**Supplementary Table 1****Intergrin  $\beta_6$  promoter sequence**

| Target gene | Forward primer (5'-3')   | Reverse primer (5'-3')    |
|-------------|--------------------------|---------------------------|
| Primer 1    | TGTGCTGTTCCAACCTCT       | TTCCTGAAGAACACCCTG        |
| Primer 2    | TTGAAACGAACCCTGAAA       | TTCCCTAGCCTTCCTTCT        |
| Primer 3    | ATTTTGGTGTAAGTTCTATG     | GACTATATTTCTATTGCTGTTGTGA |
| Primer 4    | TCAGCGTTACAAGACCAA       | TCCAGGTAGCCTCTGTTT        |
| GAPDH       | CCTGCTTATCCAGTCCCTAGCTCA | AAATGAGGCGGGTCCAAAG       |

**Supplementary Table 2****The primers sequences**

| Target gene | Forward primer (5'-3') | Reverse primer (5'-3') |
|-------------|------------------------|------------------------|
| ACAN        | CAGATGGCACCCCTCCGATAC  | GACACACCTCGGAAGCAGAA   |
| CCN2        | CCGCCAACCGCAAGATC      | ACCGACCCACCGAAGACA     |
| $\alpha$ V  | ACTGTGAAGGCGCAGAATCA   | TGCCTCTATCCAGTCGACCA   |
| $\beta$ 3   | CTCCCTTCTTCCCTCCCCTC   | ATCTCGATTACGGGACACGC   |
| $\beta$ 5   | GCCAAGTTCCAAAGTGAGCG   | CTACCAGGTCCCTTAGGGCT   |
| $\beta$ 6   | CTCACGGGTACAGTAACGCA   | CCACAAAAGAGCCAAAGCCC   |
| $\beta$ 8   | TTATGCAGCAGAGCCCCATC   | CAAGACGGAAGTCACGGGAA   |
| GAPDH       | AATGTGTCCGTCGTGGATCTGA | AGTGTAGCCCAAGATGCCCTTC |
